# Supplementary material for: Screening of FDA Approved Drugs Against COVID-19 Main Protease: Coronavirus Disease
Source: Preprints.org preprint supplement (doi:10.20944/preprints202004.0062.v1), 2020-04-06
Supplement: Supplementary file 1 [file supplementary]

**Supplementary material**

**
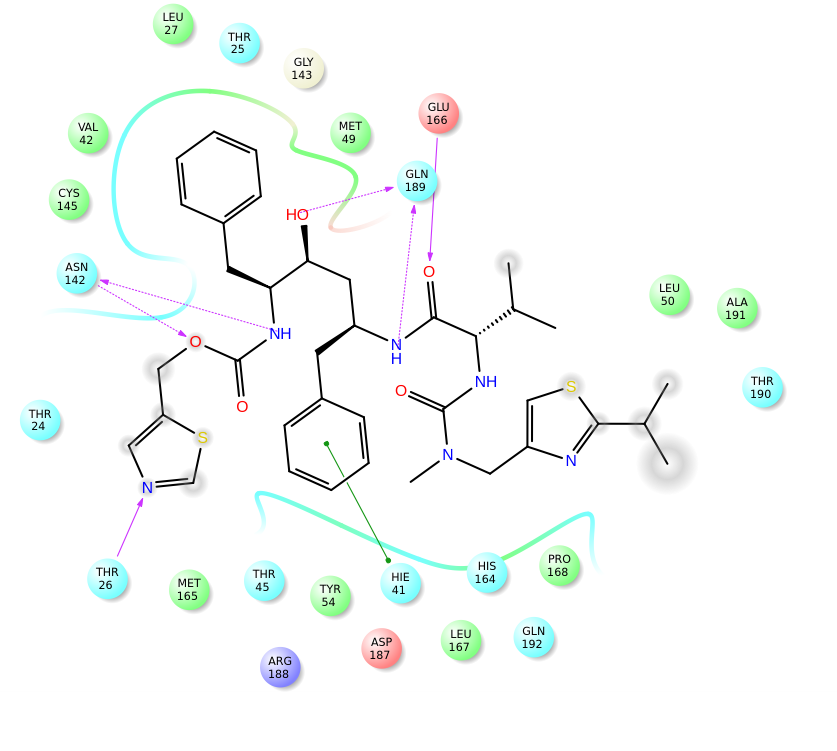
**

**Figure S1: Hydrogen bond interactions between Ritonavir and active site residues**

**
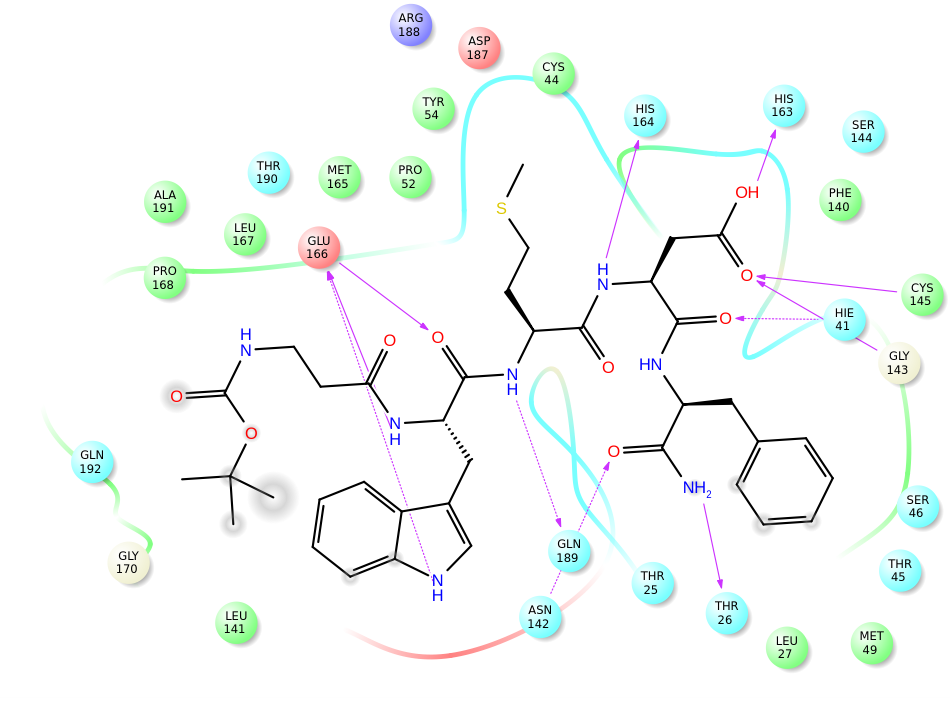
**

**Figure S2: Hydrogen bond interactions between Pentagastrin and active site residues**

**
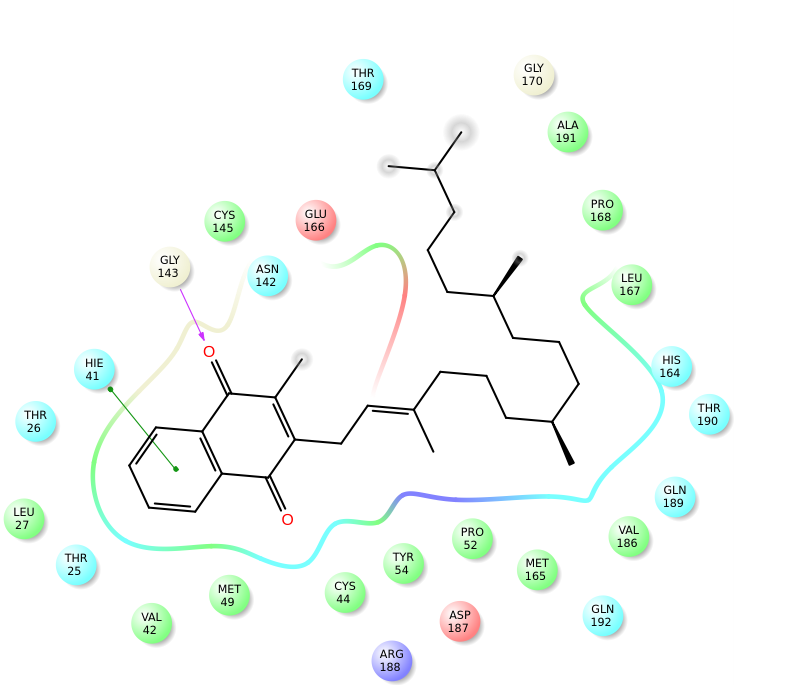
**

**Figure S3: Hydrogen bond interactions between Phytonadione and active site residues**
